# Supplementary material
Source: Springer Nature journal article supplement (https://www.springermedizin.de/resource/supplementary/12889_2011_4026_MOESM1_ESM.pdf/9491020)

Precursor → Influences → Behaviors → Health Outcomes

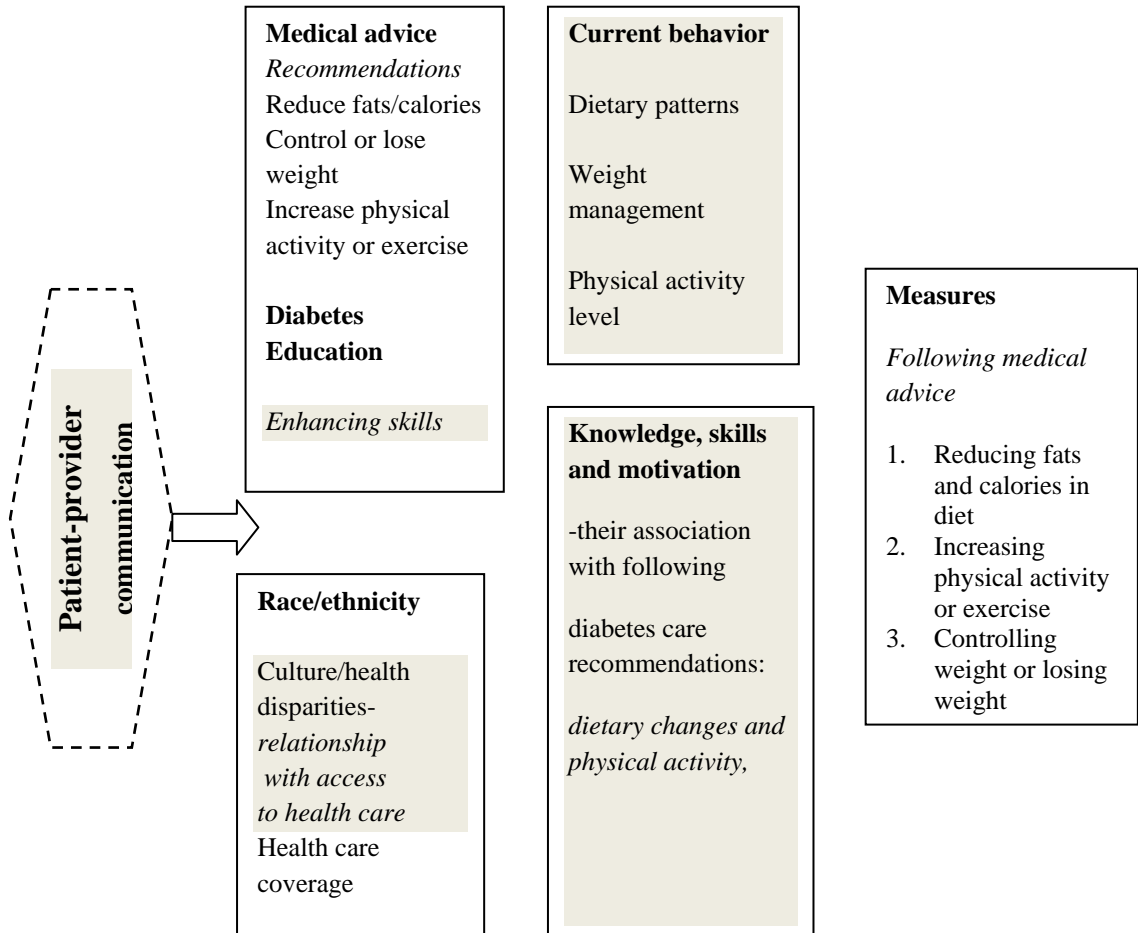

Supplement: MOESM1 [file 9491020]
